# Supplementary material for: Circulating miRNAs Expression in Myalgic Encephalomyelitis/Chronic Fatigue Syndrome
Source: MDPI journal article supplement (doi:10.3390/ijms241310582), 2023-06-24
Supplement: s1 [file s1]

## Supplementary

**Table S1.** Correlation between inflammatory cytokines, HHV-6A/B presence and miRNAs expression.

|                                                  | IFN- $\gamma$ |            | IL-17A |            | IL-2   |            | IL-21  |            | IL-23  |            | IL-6   |            | TNF- $\alpha$ |            |
|--------------------------------------------------|---------------|------------|--------|------------|--------|------------|--------|------------|--------|------------|--------|------------|---------------|------------|
|                                                  | $r^1$         | $p$ -value | $r^1$  | $p$ -value | $r^1$  | $p$ -value | $r^1$  | $p$ -value | $r^1$  | $p$ -value | $r^1$  | $p$ -value | $r^1$         | $p$ -value |
| <b>miR-124-3p</b>                                | -0,067        | 0,613      | -0,092 | 0,487      | -0,022 | 0,866      | 0,000  | 0,997      | 0,016  | 0,905      | 0,092  | 0,500      | 0,061         | 0,646      |
| <b>miR-140-5p</b>                                | -0,066        | 0,622      | 0,069  | 0,606      | 0,007  | 0,957      | 0,170  | 0,197      | 0,094  | 0,479      | 0,033  | 0,810      | 0,157         | 0,236      |
| <b>miR-551b-3p</b>                               | -0,161        | 0,223      | -0,188 | 0,154      | -0,249 | 0,057      | -0,098 | 0,462      | -0,124 | 0,351      | -0,134 | 0,327      | -0,027        | 0,841      |
| <b>miR-448</b>                                   | -0,271        | 0,038      | -0,239 | 0,068      | -0,259 | 0,048      | -0,438 | 0,001      | -0,366 | 0,004      | -0,379 | 0,004      | -0,232        | 0,077      |
| <b>miR-142-5p</b>                                | -0,245        | 0,061      | -0,133 | 0,315      | -0,114 | 0,391      | -0,152 | 0,250      | -0,178 | 0,176      | 0,006  | 0,962      | -0,066        | 0,617      |
| <b>miR-127-3p</b>                                | -0,031        | 0,815      | 0,080  | 0,545      | -0,014 | 0,916      | 0,083  | 0,533      | 0,097  | 0,465      | 0,061  | 0,656      | 0,170         | 0,197      |
| <b>miR-143-3p</b>                                | -0,303        | 0,020      | -0,169 | 0,201      | -0,199 | 0,131      | -0,155 | 0,242      | -0,257 | 0,050      | -0,179 | 0,188      | 0,008         | 0,950      |
| <b>miR-150-5p</b>                                | -0,214        | 0,104      | -0,145 | 0,272      | -0,183 | 0,165      | -0,178 | 0,177      | -0,215 | 0,102      | -0,325 | 0,015      | -0,124        | 0,350      |
| <b>HHV-6<br/>copies/10<sup>6</sup><br/>cells</b> | -0,121        | 0,362      | -0,122 | 0,358      | -0,083 | 0,534      | -0,144 | 0,275      | -0,060 | 0,651      | -0,040 | 0,768      | -0,181        | 0,170      |

<sup>1</sup> Correlation coefficients (r) obtained from Spearman Correlation analysis.
